# Supplementary material for: Congenital anomalies and genetic disorders in neonates and infants: a single-center observational cohort study
Source: Eur J Pediatr. 2021 Aug 4;181(1):359–67. doi: 10.1007/s00431-021-04213-w (PMC8760213; doi:10.1007/s00431-021-04213-w)
Supplement: Supplementary file 3 — Supplementary file3 (XLSX 28 KB) [file 431_2021_4213_MOESM3_ESM.xlsx]

## Sheet: Outline Supplementary Table 3
Supplementary Table 3 consists of three subtables:
Supplementary Table 3a	Clinical details of 72 patients who received a conclusive genetic diagnosis
Supplementary Table 3b	Genetic details of single nucleotide mutations identified in 44/72 patients who received a conclusive genetic diagnosis
Supplementary Table 3c	Genetic details of chromosomal aberrrations and methylatoin defects identified in 28/72 patients who received a conclusive genetic diagnosis

## Sheet: Supplementary table 3a
	Clinical information	Phenotypic features in HPO	Congenital anomaly	Type of mutation	Associated genetic disorder	Timing of genetic diagnosis
2	Macrosomy and neonatal hypoglycemia	HP:0001520 HP:0000825	Multiple	Single nucleotide variant	Congenital hyperinsulism	Neonatal
12	Ichthyosis and dysmorphia	HP:0001377 HP:0008064 HP:0011451 HP:0000316 HP:0011039 HP:0004209 HP:0005768 HP:0000402	Multiple	Single nucleotide variant	Sjogren-Larsson syndrome	Post-neonatal
15	Malrotation, posterior urethral valves, and persistent pulmonary hypertension of the newborn	HP:0010957 HP:0002092 HP:0002566 HP:0004930	Multiple	Single nucleotide variant	Alveolar capillary dysplasia with misalignment of the pulmonary veins	Post-neonatal
26	Facial dysmorphia, agyria, dysgenesis corpus callosum, and agenesis septum pellucidum	HP:0001339 HP:0001273 HP:0001331 HP:0002118 HP:0000316 HP:0006610 HP:0000464 HP:0000308 HP:0000598	Multiple	Copy number variant	Miller dieker syndrome	Neonatal
86	Hypothermia	HP:0011748	Isolated	Single nucleotide variant	Isolated ACTH deficiency	Post-neonatal
88	Prematurity, polyhydramnios and vesciouretral reflux	HP:0000076	Isolated	Single nucleotide variant	Cantu syndrome	Post-neonatal
128	Prematurity and hydrocephalus	HP:0001305	Isolated	Single nucleotide variant	Beta-ureidopropionase deficiency	Post-neonatal
129	Agenesis corpus callosum, colpocephaly, and facial dysmorphia	HP:0001274 HP:0030048 HP:0000431 HP:0001290 HP:0012471	Multiple	Copy number variant	Koolen de Vries syndrome	Post-neonatal
156	Truncus arteriosus and congenital nasolacrimal duct obstruction	HP:0001660 HP:0007678	Multiple	Single nucleotide variant	Persistent truncus arteriosus (GATA6)	Post-neonatal
158	Dysmaturity	HP:0001511	Isolated	Single nucleotide variant	Leri-Weil syndrome	Post-neonatal
224	Intracardial tumors	HP:0100544	Isolated	Single nucleotide variant	Tuberous sclerosis type 2	Post-neonatal
277	Prematurity and hypertrophic cardiomyopathy	HP:0001639	Isolated	Single nucleotide variant	Noonan syndrome type 8	Post-neonatal
310	Atrial septal defect, inguinal hernia, and testicular atrophy	HP:0000023 HP:0001631 HP:0000029	Multiple	Single nucleotide variant	SCAD deficiency	Post-neonatal
343	Neonatal seizures	HP:0001250	Isolated	Single nucleotide variant	Tuberous sclerosis complex	Neonatal
358	Hydrops fetalis, perinatal asphyxia, and dysmorphia	HP:0002789 HP:0000582 HP:0000369 HP:0009623 HP:0001852 HP:0000464	Multiple	Aneuploidy	Trisomy 21	Neonatal
413	Prematurity and mono-kidney	HP:0000122	Isolated	Single nucleotide variant	Pelizaus Merzbacher syndrome	Post-neonatal
425	Congenital hernia diaphragmatic, intracardial tumors, and prenatal tuberous sclerosis confirmed	HP:0000776 HP:0100544	Multiple	Single nucleotide variant	Tuberous sclerosis	Prenatal
432	Microcephaly and unilateral renal agenesis	HP:0011451 HP:0000122	Multiple	Single nucleotide variant	Intellectual Developmental Disorder with Dysmorphic Facies and Behavioral Abnormalities	Post-neonatal
439	Trisomy 21 and atrioventricular septal defect	HP:0006695 HP:0000316 HP:0001852	Multiple	Aneuploidy	Trisomy 21	Neonatal
443	Multiple facial dysmorphia	HP:0000534 HP:0000234 HP:0000343 HP:0001595	No	Single nucleotide variant	Intellectual disability	Post-neonatal
466	Congenital heart defect and prenatal noonan syndrome	HP:0010878 HP:0005173 HP:0001641	Multiple	Single nucleotide variant	Noonan syndrome type 1	Prenatal
504	Multiple dysmorphia and ventricular septal defect	HP:0001629 HP:0000308 HP:0000316 HP:0000369 HP:0000465 HP:0000160 HP:0001838 HP:0001792 HP:0001182 HP:0000954	Multiple	Single nucleotide variant	Microcephalic osteodysplastic primordial dwarfism type I	Post-neonatal
518	Recurrent hypoglycemia	HP:0001988	Isolated	Single nucleotide variant	Familial hypocalciuric hypercalcemia type 1	Post-neonatal
536	Persistent pulmonary hypertension of the newborn and congenital heart defect	HP:0000316 HP:0000494 HP:0000158	Multiple	Aneuploidy	Trisomy 21	Neonatal
565	Prenatal atrioventricular septal defect suspect for trisomy 21	HP:0006695 HP:0000316 HP:0001852	Multiple	Aneuploidy	Trisomy 21	Prenatal
580	Intellectual disability and feedings problems	HP: 0001290	No	Single nucleotide variant	Intellectual disability	Post-neonatal
595	Tetralogy of Fallot, unilateral multicystic kidney, and multiple facial dysmorphia	HP:0001636 HP:0000003 HP:0012732 HP:0000316 HP:0000369 HP:0000286 HP:0000520	Multiple	Single nucleotide variant	Crouzon syndrome	Post-neonatal
643	Chylothrax, duplex right kidney, macrosomy and narrow aortic arch	HP:0010310 HP:0000081 HP:0001520 HP:0012304	Multiple	Single nucleotide variant	Desanto-Shinawi syndrome	Post-neonatal
646	Mono-kidney right with duplex system, hypospadia, oligodactyly, microcephaly and facial dysmorphia	HP:0000122 HP:0000047 HP:0001180 HP:0009777 HP:0011451 HP:0000219 HP:0000400 HP:0010325 HP:0010624	Multiple	Single nucleotide variant	Fanconi anemia E	Post-neonatal
660	Anal atresia	HP:0012732	Isolated	Copy number variant	Currarino syndroom	Post-neonatal
697	Congenital heart defect and multiple facial dysmorphia	HP:0001273 HP:0004415 HP:0001650 HP:0000278 HP:0000464 HP:0002162 HP:0100702 HP:0000598 HP:0000767	Multiple	Single nucleotide variant	Noonan syndrome type 8	Post-neonatal
726	Truncus arteriosus type 1 with large ventricular septal defect	HP:0004384 HP:0001629	Isolated	Copy number variant	22q11.2 deletion syndrome	Neonatal
731	Dysmaturity and microcephaly	HP:0001511 HP:0011451	Multiple	Single nucleotide variant	Cohen syndrome	Post-neonatal
741	Narrow aorta arch, syndactyly, horseshoe kidney, and hypospadia	HP:0000047 HP:0012304 HP:0000085 HP:0011221 HP:0000369 HP:0001171 HP:0000175 HP:0000278 HP:0002162 HP:0000664	Multiple	Single nucleotide variant	Cornelia de Lange syndrome	Neonatal
791	Trisomy 21 with prenatal atrioventricular septal defect	HP:0006695 HP:0000582 HP:0000954 HP:0000158	Multiple	Aneuploidy	Trisomy 21	Prenatal
810	Prenatal suspect for trisomy 18	HP:0000520 HP:0000219 HP:0000431 HP:0000598 HP:0000960 HP:0000954 HP:0030148	Multiple	Aneuploidy	Trisomy 18	Prenatal
828	Suspicious neuromuscular disease	HP:0002804	Isolated	Single nucleotide variant	Spinal muscular atrophy type 0	Neonatal
860	Choanal atresia and multiple facial dysmorphia	HP:0000453 HP:0000494 HP:0010669 HP:0008551 HP:0005321	Multiple	Single nucleotide variant	Treacher Collins syndroom type 1	Neonatal
872	Trisomy 13	HP:0000431 HP:0002007 HP:0001539 HP:0001500 HP:0001829 HP:0000003 HP:0000248	Multiple	Aneuploidy	Trisomy 13	Prenatal
887	Counseling neurofibromatosis	HP: 0001290	No	Single nucleotide variant	Neurofibromatosis type I	Post-neonatal
889	Ambiguous genitalia	HP:0000062	Isolated	Single nucleotide variant	Androgen insensitivity	Post-neonatal
903	Persistent pulmonary hypertension of the newborn, trisomy 21, and atrioventricular septal defect	HP:0002092 HP:0006695 HP:0006705	Multiple	Aneuploidy	Trisomy 21	Neonatal
905	Dysmaturity and skeletal dysplasia	HP:0001511 HP:0000239 HP:0011429 HP:0011428 HP:0002980	Multiple	Single nucleotide variant	Osteogenesis imperfecta type 3	Post-neonatal
911	Turner syndrome, horsesoe kidney left, hydronefrosis, and megaureter	HP:0010878 HP:0012098 HP:0000003 HP:0000072 HP:0000085	Multiple	Aneuploidy	Turner syndroom	Prenatal
948	Large ventricular septal defect and trisomy 21	HP:0006695 HP:0000316 HP:0001852	Multiple	Aneuploidy	Trisomy 21	Neonatal
1005	Intellectual disability	HP: 0001290	No	Single nucleotide variant	Cantu syndrome	Post-neonatal
1007	Multiple congenital anomalies	HP:0001539 HP:0001188 HP:0000369 HP:0000325	Multiple	Aneuploidy	Trisomy 18	Neonatal
1012	Prematurity, prenatal suspicious for achondroplasia, and bilateral hydronefrosis	HP:0000072 HP:0011428 HP:0011429	Multiple	Single nucleotide variant	Achondroplasia	Post-neonatal
1021	Skeletdysplasia, situs inversus totalis, dysmaturity, tethered spinal cord and diastematomyelia	HP:0001511 HP:0002144 HP:0001696 HP:0100563 HP:0000953 HP:0000960 HP:0000772	Multiple	Single nucleotide variant	Primary ciliary dyskinesia type 2	Post-neonatal
1031	Trisomy 21	HP:0000286 HP:0000316 HP:0001852 HP:0003097	Multiple	Aneuploidy	Trisomy 21	Prenatal
1062	Multiple congenital anomalies	HP:0000426 HP:0002007 HP:0005487 HP:0000278 HP:0000280 HP:0100807 HP:0002804 HP:0011039 HP:0002616 HP:0004927	Multiple	Single nucleotide variant	Marfan syndrome type 1	Post-neonatal
1065	Cardiac defect	HP:0002789 HP:0010878	Isolated	Copy number variant	8p23.1 duplication syndrome	Prenatal
1130	Congenital diaphragmatic hernia left, Prenatal 45X karyotyping	HP:0000776 HP:0000158	Multiple	Aneuploidy	Turner syndrome	Prenatal
1135	Prenatal duplex collecting system, and megaureter right	HP:0000081 HP:0000070 HP:0000072	Isolated	Methylation defect	Beckwith Wiedemann syndrome	Neonatal
1151	Choanal atresia bilateral, ventricular septal defect, coloboma, and supravalvular aortic stenosis	HP:0000453 HP:0001629 HP:0004381 HP:0000589	Multiple	Single nucleotide variant	CHARGE syndrome	Post-neonatal
1153	Dandy Walker malformation, intracerebral hemorrhage, and unilateral hyndronefrosis	HP:0002170 HP:0001305 HP:0000126 HP:0001873 HP:0002904	Multiple	Copy number variant	Unbalanced translocation (1;10)	Neonatal
1175	peripheral pulmonary artery stenosis, macroglossia, and retrognathia	HP:0000278 HP:0000158 HP:0004969	Multiple	Methylation defect	Beckwith Wiedemann syndrome	Post-neonatal
1200	Prenatal unilateral pleural effusion, small cerebellum, and mega cisterna magna	HP:0002202 HP:0001272 HP:0002280	Multiple	Single nucleotide variant	Zhu-Tokita-Takenouchi-Kim syndrome	Post-neonatal
1204	Craniosynostosis and perimembraneous ventricular septal defect	HP:0011324 HP:0011682	Multiple	Single nucleotide variant	Turner-type X-linked syndromic mental retardation (MRXST)	Post-neonatal
1233	Hydrops foetalis	HP:0002789 HP:0000158	Multiple	Aneuploidy	Trisomy 21	Neonatal
1234	Ascites and cholestasis	HP:0001791 HP:0001396	Isolated	Single nucleotide variant	Niemann-Pick disease type C	Post-neonatal
1241	Fetal growth restriction	HP:0001511	Isolated	UPD	Maternal uniparental disomy of chromosome 16	Prenatal
1292	Butterfly vertebra Th6, ventricular septal defect, micropththalmia, and embryotoxon	HP:0003316 HP:0001629 HP:0000568 HP:0000627	Multiple	Copy number variant	22q11.2 deletion syndrome	Neonatal
1300	Neonatal seizures	HP:0001250	Isolated	Single nucleotide variant	Early infantile epileptic encephalopathy-7	Post-neonatal
1310	Dysmorphia and feeding problems	HP:0000280 HP:0000316 HP:0000369 HP:0000286 HP:0001052 HP:0003196 HP:0001500 HP:0001769 HP:0002104	Multiple	Single nucleotide variant	Costello syndrome	Post-neonatal
1319	Trisomy 21 and atrioventricular septal defect	HP:0006695 HP:0000316 HP:0001852	Multiple	Aneuploidy	Trisomy 21	Prenatal
1326	Congenital diaphragmatic hernia and obstructive hydrocephalus	HP:0000776 HP:0000238	Multiple	Copy number variant	Intellectual disability	Prenatal
1330	Dysmaturity, hand-defect, and atrioventricular septal defect	HP:0001511 HP:0001762 HP:0001629 HP:0001631 HP:0000664 HP:0000601 HP:0008665 HP:0000369 HP:0001188 HP:0000168	Multiple	Unbalanced translocation	Unbalanced translocation (9;19)	Prenatal
1429	Hypotonia, microcephaly, and intellectual disability	HP:0011451 HP:0000122 HP: 0001290 HP:0011451	No	Single nucleotide variant	DE NOVO frameshift variant in het ZNF292 gen	Post-neonatal
1450	Tetralogy of Fallot and multiple dysmorphia	HP:0001636 HP:0000347 HP:0000369 HP:0100807	Multiple	Copy number variant	22q11.2 deletion syndrome	Prenatal
1459	Skeletal dysplasia and hypophosphatasia	HP:0003912	Isolated	Single nucleotide variant	Hypophosphatasia	Neonatal
1461	Jejunal atresia	HP:0005235	Isolated	Single nucleotide variant	Cystic fibrosis	Neonatal

## Sheet: Supplementary table 3b
Patient ID	Associated genetic disorder	Diagnostic tool	Type of mutation	Gene	Genomic (hg19)	cDNA	Protein effect	Zygosity
2	Congenital hyperinsulism	Sanger sequencing (gene panel)	SNV	ABCC8	Chr11(GRCh37):g.17415881G>A Chr11(GRCh37):g.17416774delinsTA	NM_000352.3:c.4477C>T NM_000352.3:c.4356delinsTA	p.(Arg1493Trp) p.(Glu1452Aspfs*61)	compound heterozygous
12	Sjogren-Larsson syndrome	Sanger sequencing (gene panel)	SNV	ALDH3A2	Chr17(GRCh37):g.19555047C>T	NM_001031806.1:c.341C>T	p.(Pro114Leu)	homozygous
15	Alveolar capillary dysplasia with misalignment of the pulmonary veins	Sanger sequencing (gene panel)	SNV	FOXF1	Chr16(GRCh37):g.86545073_86545074del	NM_001451.2:c.898_899del	p.(Leu300Valfs*40)	heterozygous
86	Isolated ACTH deficiency	Sanger sequencing (gene panel)	SNV	TBX19	Chr1(GRCh37):g.168262448C>T	NM_005149.2:c.535C>T	p.(Arg179*)	homozygous
88	Cantu syndrome	Sanger sequencing (gene panel)	SNV	ABCC9	Chr12(GRCh37):g.21995375G>A	NM_005691.2:c.3346C>T	p.(Arg1116Cys)	heterozygous
128	Beta-ureidopropionase deficiency	Sanger sequencing (gene panel)	SNV	UBP1	Chr22(GRCh37):g.24896224C>A	NM_016327.2:c.254C>A	p.(ALA85Glu)	compound heterozygous
156	Persistent truncus arteriosus (GATA6)	WES	SNV	GATA6	Chr18(GRCh37):g.19756950C>A	NM_005257.4:c.1170C>A	p.(Cys390*)	heterozygous
158	Leri-Weil syndrome	Sanger sequencing (gene panel)	SNV	SHOX	ChrX(GRCh37):g.601574A>T	NM_000451.3:c.505A>T	p.(Arg169*)	heterozygous
224	Tuberous sclerosis type 2	Sanger sequencing (gene panel)	SNV	TSC2	Chr16(GRCh37):g.2134645_2134646del	NM_000548.3:c.4422_4423del	p.(Arg1474Serfs*49)	heterozygous
277	Noonan syndrome type 8	Sanger sequencing (gene panel)	SNV	RIT1	Chr1(GRCh37):g.155874589G>C	NM_001256821.1:c.221C>G	p.(Ala74Gly)	heterozygous
310	SCAD deficiency	Sanger sequencing (gene panel)	SNV	ACADS	Chr12(GRCh37):g.121176083G>A	NM_000017.3:c.625G>A	p.(Gly209Ser)	homozygous
343	Tuberous sclerosis type 1	Sanger sequencing (gene panel)	SNV	TSC1	Chr9(GRCh37):g.135797279dup	NM_000368.4(TSC1):c.590dup	p.(Cys197Trpfs*21)	heterozygous
413	Pelizaus Merzbacher syndrome	WES	SNV	PLP1	ChrX(GRCh37):g.103041611C>G	NM_001128834.2:c.409C>G	p.(Arg137Gly)	heterozygous
425	Tuberous sclerosis	Sanger sequencing (gene panel)	SNV	TSC1	Chr9(GRCh37):g.135787750_135787751del	NM_000368.4:c.831_832del	p.(His279Profs*20)	heterozygous
432	Intellectual Developmental Disorder with Dysmorphic Facies and Behavioral Abnormalities	WES	SNV	FBXO11	Chr2(GRCh37):g.48060015dup	NM_001190274.1:c.1046dup	p.(Asn349Lysfs*3)	heterozygous/de novo
443	Intellectual disability	WES	SNV	SETD5	Chr3(GRCh37):g.9512532_9512533del	NM_001080517.1:c.3114_3115del	p.(Arg1039Trpfs*8)	heterozygous/de novo
466	Noonan syndrome type 1	Sanger sequencing (gene panel)	SNV	PTPN11	Chr12(GRCh37):g.112884189A>G	NM_001330437.1:c.124A>G	p.(Thr42Ala)	heterozygous
504	Microcephalic osteodysplastic primordial dwarfism type I	Sanger sequencing (gene panel)	SNV	RNU4ATAC	Chr2(GRCh37):g.122288506G>A	NR_023343.1:n.51G>A	-	homozygous
518	Familial hypocalciuric hypercalcemia type 1	Sanger sequencing (gene panel)	SNV	ABCC8	Chr11(GRCh37):g.17415881G>A Chr11(GRCh37):g.17428964G>A	NM_000352.3:c.4477C>T NM_000352.3:c.2857C>T	p.(Arg1493Trp) p.(Gln953*)	heterozygous/de novo
580	Intellectual disability	WES	SNV	DLG4	Chr17(GRCh37):g.7107027G>A	NM_001365.4:c.448C>T	p.(Gln150*)	heterozygous/de novo
595	Crouzon syndrome	WES	SNV	FGFR2	Chr10(GRCh37):g.123279606A>C	NM_022970.3:c.826T>G	p.(Phe276Val)	heterozygous
643	Desanto-Shinawi syndrome	WES	SNV	WAC	Chr10(GRCh37):g.28872413_28872417dup	NM_016628.4:c.360_364dup	p.(Ser122Thrfs*72)	heterozygous
646	Fanconi anemia E	Sanger sequencing (gene panel)	SNV	FANCE	Chr6(GRCh37):g.35426215C>T	NM_021922.2:c.1111C>T	p.(Arg371Trp)	homozygous
697	Noonan syndrome type 8	Sanger sequencing (gene panel)	SNV	RIT1	Chr1(GRCh37):g.155874589G>C	NM_001256821.1:c.221C>G	p.(Ala74Gly)	heterozygous
731	Cohen syndrome	WES	SNV	VPS13B	Chr8(GRCh37):g.100127938del Chr8(GRCh37):g.100847447del	NM_017890.4:c.773del NM_017890.4:c.9712del	p.(Leu258*) p.(Glu3238Asnfs*5)	compound heterozygous
741	Cornelia de Lange syndrome	Sanger sequencing (gene panel)	SNV	NIPBL	Chr5(GRCh37):g.37024748_37024750del	NM_133433.3:c.5636_5638del	p.(Gln1879del)	heterozygous
828	Spinal muscular atrophy type 0	Sanger sequencing (gene panel)	SNV	SMN1	Chr5(GRCh37):g.70220768_70249769del	homozygous deletion exon 7 and 8	-	homozygous
860	Treacher Collins syndroom type 1	Sanger sequencing (gene panel)	SNV	TCOF	Chr5(GRCh37):g.149776281dup	NM_001135243.1:c.4218dup	p.(Ser1407Valfs*23)	heterozygous/de novo
887	Neurofibromatosis type I	Sanger sequencing (gene panel)	SNV	NF1	Chr17(GRCh37):g.29548939G>A	NM_001042492.2:c.1713G>A	p.(Trp571*)	heterozygous/de novo
889	Androgen insensitivity	WES	SNV	AR	ChrX(GRCh37):g.66905927G>T	NM_000044.4:c.1844G>T	p.(Cys615Phe)	hemizygous/mosaic
905	Osteogenesis imperfecta type 3	Sanger sequencing (gene panel)	SNV	COL1A2	Chr7(GRCh37):g.94045726G>A	NM_000089.3:c.1774G>A	p.(Gly592Ser)	heterozygous
1005	Cantu syndrome	Sanger sequencing (gene panel)	SNV	ABCC9	Chr12(GRCh37):g.21998574G>A	NM_005691.2:c.3059C>T	p.(Ser1020Leu)	heterozygous/de novo
1012	Achondroplasia	Sanger sequencing (gene panel)	SNV	FGFR3	Chr4(GRCh37):g.1806119G>A	NM_000142.4:c.1138G>A	p.(Gly380Arg)	heterozygous/de novo
1021	Primary ciliary dyskinesia type 2	WES	SNV	DNAAF3	Chr19(GRCh37):g.55670785dup	NM_001256714.1:c.1472dup	p.(Phe493Ilefs*52)	homozygous
1062	Marfan syndrome type 1	WES	SNV	FBN1	Chr15(GRCh37):g.48780621A>C	NM_000138.4:c.3152T>G	p.(Phe1051Cys)	heterozygous
1151	CHARGE syndrome	Sanger sequencing (gene panel)	SNV	CHD7	Chr8(GRCh37):g.61655489C>T	NM_017780.3: c.1498C>T	p.(Gln500*)	heterozygous
1200	Zhu-Tokita-Takenouchi-Kim syndrome	WES	SNV	SON	Chr21(GRCh37):g.34927290_34927293del	NM_138927.2:c.5753_5756del	p.(Val1918Glufs*87)	heterozygous/de novo
1204	Turner-type X-linked syndromic mental retardation (MRXST)	WES	SNV	HUWE1	ChrX(GRCh37):g.53674333C>T	NM_031407.5:c.329G>A	p.(Arg110Gln)	heterozygous/de novo
1234	Niemann-Pick disease type C	Sanger sequencing (gene panel)	SNV	NPC1	Chr18(GRCh37):g.21131591C>T Chr18(GRCh37):g.21118528G>C	NM_000271.4(NPC1):c.1654G>A NM_000271.4(NPC1):c.3019C>G	p.(Asp552Asn) p.(Pro1007Ala)	compound heterozygous
1300	Early infantile epileptic encephalopathy-7	Sanger sequencing (gene panel)	SNV	KCNQ2	Chr20(GRCh37):g.62044824C>A	NM_172107.2:c.1742G>T	p.(Arg581Leu)	heterozygous/de novo
1310	Costello syndrome	Sanger sequencing (gene panel)	SNV	HRAS	Chr11(GRCh37):g.534289C>T	NM_005343.2: c.34G>A	p.(Gly12Ser)	heterozygous/de novo
1429	Intellectual disability	WES	SNV	ZNF292	Chr6(GRCh37):g.87969375_87969378del	NM_015021.2:c.6028_6031del	p.(Ala2010*))	heterozygous/de novo
1459	Hypophosphatasia	Sanger sequencing (gene panel)	SNV	ALPL	Chr1(GRCh37):g.21887655G>T	NM_000478.5:c.247G>T	p.(Glu83*)	homozygous
1461	Cystic fibrosis	Sanger sequencing (gene panel)	SNV	CFTR	Chr7(GRCh37):g.117199646_117199648del	NM_000492.4:c.1521_1523del	p.(Phe508del)	homozygous
					HP:0011451

## Sheet: Supplementary table 3c
Patient ID	Associated genetic disorder	Diagnostic tool	Type of mutation	Structural defect (Hg19)
26	Miller dieker syndrome	Genomic microarray	CNV	arr 17p13.3(526-3,793,448)x1, X(pterqter)(0-155,270,560)x3
129	Koolen de Vries syndrome	Genomic microarray	CNV	arr 17q21.31(43,574,909-44,212,417)x1
358	Trisomy 21	Karyotyping	Aneuploidy	47, XX, +21
439	Trisomy 21	Karyotyping	Aneuploidy	47, XY, +21
536	Trisomy 21	Karyotyping	Aneuploidy	47, XX, +21
565	Trisomy 21	NIPT*	Aneuploidy	47, XY, +21
660	Currarino syndrome	Genomic microarray	CNV	arr Xq28(148,458,784-148,710,253)x2,6q15(90,297,517-90,644,784)x3,7q36.3(156,467,065-158,137,535)x1
726	22q11.2 deletion syndrome	Genomic microarray	CNV	arr 22q11.21(18,916,843-20,311,859)x1
791	Trisomy 21	QF-PCR	Aneuploidy	47, XX, +21
810	Trisomy 18	NIPT*	Aneuploidy	trisomy/tetrasomy 18p
872	Trisomy 13	NIPT*	Aneuploidy	47, XX, +13
903	Trisomy 21	Karyotyping	Aneuploidy	47, XX ,+21
911	Turner syndrome	QF-PCR	Aneuploidy	45, XO
948	Trisomy 21	Karyotyping	Aneuploidy	47, XY, +21
1007	Trisomy 18	Karyotyping	Aneuploidy	47, XY, +18
1031	Trisomy 21	NIPT*	Aneuploidy	47, XX, +21
1065	8p23.1 duplication syndrome	Genomic microarray	CNV	arr 8p23.1(8,093,170-11,898,981)x3 dn
1130	Turner syndrome	Karyotyping	Aneuploidy	45, XO
1135	Beckwith Wiedemann syndrome	Methylation assay	Methylation defect	Hypomethylation KCNQ1Ot1
1153	Unbalanced translocation (1;10)	Genomic microarray	Unbalanced translocation	arr 1q43q44(240,358,657-249,224,685)x1,10p15.3p14(117,527-11,828,555)x3
1175	Beckwith Wiedemann syndrome	Methylation assay	Methylation defect	Hypomethylation KCNQ1 and hypermethylation H19. Duplication 11p15
1233	Trisomy 21	Karyotyping	Aneuploidy	47, XX, +21
1241	Maternal uniparental disomy of chromosome 16	NIPT*	UPD	upd(16)mat.arr 16p13.3p13.2(89,561-8,914,906)x2 homozygous
1292	22q11.2 deletion syndrome	Genomic microarray	CNV	arr Xp22.31(8,135,645-8,437,304)x3 pat,Xp22.31(8,437,306-8,945,031)x4 pat,22q11.21(18,644,791-21,800,798)x1 dn
1319	Trisomy 21	Karyotyping	Aneuploidy	47, XX, +21
1326	Intellectual disability	Genomic microarray	CNV	arr 1q21.1(145,287,320-145,764,680)x3 maternal
1330	Unbalanced translocation (9;19)	Genomic microarray	Unbalanced translocation	arr 9q34.2q34.3(137,304,438-141,020,390)x1,19p13.3(260,912-2,384,330)x3
1450	22q11.2 deletion syndrome	Genomic microarray	CNV	arr 22q11.21(18,648,867-21,800,472)x1
*six diagnoses were confirmed with QF-PCR after abnormal noninvasive prenatal testing
